# Supplementary material for: Design and synthesis of cyclic lipidated peptides derived from the C-terminus of Cx43 for hemichannel inhibition and cardiac endothelium targeting
Source: Royal Society of Chemistry journal article supplement (doi:10.1039/d4md00850b), 2024-12-21
Supplement: d4md00850b1.pdf [file d4md00850b1.pdf]

## SUPPORTING INFORMATION

### Design and synthesis of cyclic lipidated peptides derived from the C-terminus of Cx43 for hemichannel inhibition and cardiac endothelium targeting

Debora Iaculli<sup>a</sup>, Jade Montgomery<sup>b,c</sup>, Arthur Lamouroux<sup>a</sup>, Anne Caufriez<sup>a,d</sup>, Rafael  
Gozalbes<sup>e</sup>, Mathieu Vinken<sup>d</sup>, Filippo Molica<sup>b,c</sup>, Brenda R. Kwak<sup>b,c</sup>, Steven Ballet<sup>a\*</sup>

<sup>a</sup> Research Group of Organic Chemistry, Departments of Bioengineering Sciences and Chemistry, Vrije  
Universiteit Brussel, Brussels, Belgium; <sup>b</sup> Department of Pathology and Immunology, and <sup>c</sup> Geneva Center for  
Inflammation Research, Faculty of Medicine, University of Geneva, Geneva, Switzerland; <sup>d</sup> Department of  
Pharmaceutical and Pharmacological Sciences, Vrije Universiteit Brussel, Brussels, Belgium; <sup>e</sup> ProtoQSAR SL,  
Parque Tecnológico de Valencia, Paterna (Valencia), Spain

\*Corresponding author. Email address: [steven.ballet@vub.be](mailto:steven.ballet@vub.be)

#### Content

|           |                                      |           |
|-----------|--------------------------------------|-----------|
| <b>1.</b> | <b>Circular Dichroism (CD)</b>       |           |
|           | <b>spectra.....</b>                  | <b>2</b>  |
| <b>2.</b> | <b>Biological activity.....</b>      | <b>2</b>  |
| <b>3.</b> | <b>Peptide characterization.....</b> | <b>4</b>  |
|           | <i>3a. HPLC chromatograms of</i>     |           |
|           | <i>peptides.....</i>                 | <i>4</i>  |
|           | <i>3b. Characterization.....</i>     | <i>15</i> |

## 1. Circular Dichroism (CD) spectra

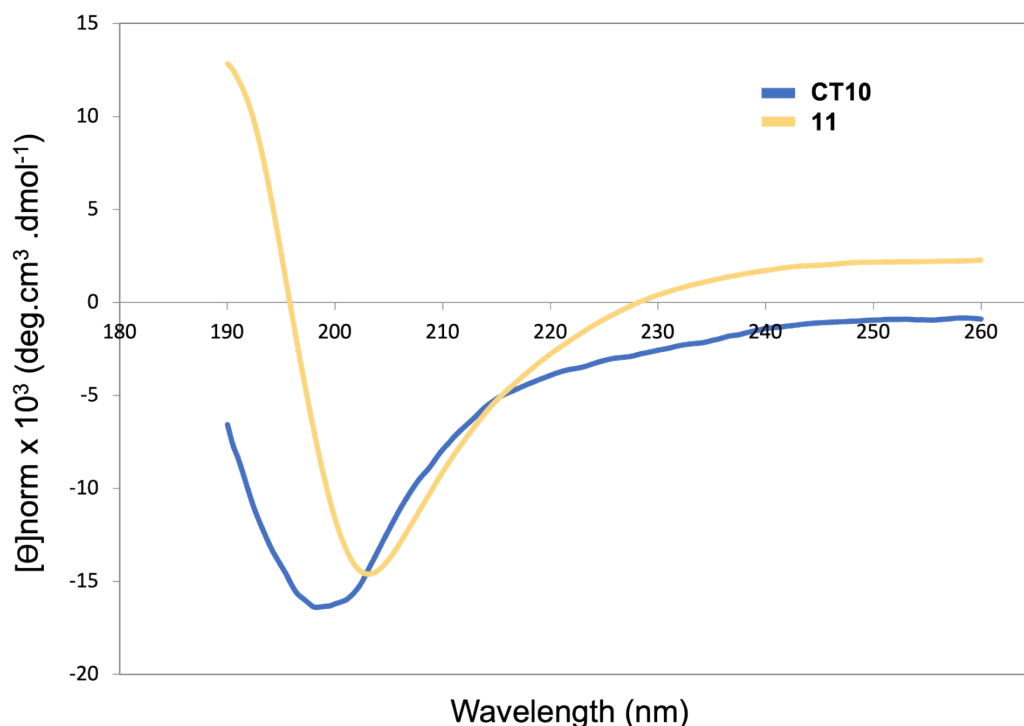

**Figure S1.** CD spectra of linear peptide **CT10** (blue) and cyclic analogue **11** (yellow) at 200  $\mu\text{M}$  concentration in mQ water. A minimum at 200 nm indicates a random coil conformation.

## 2. Biological activity

**Table S1.** ATP release data shown in **Figure 5a**.

|                                      | ATP release <sup>a</sup> | SEM     |
|--------------------------------------|--------------------------|---------|
| Control                              | 38.4228                  | 3.8230  |
| Calcium-free                         | 100                      | /       |
| Cbx                                  | 43.7932                  | 5.5259  |
| Triton                               | 248.6069                 | 26.2110 |
| TAT-Gap19 100 $\mu\text{M}$          | 215.7692                 | 16.4991 |
| TAT-Gap19 50 $\mu\text{M}$           | 127.3083                 | 5.5652  |
| TAT-Gap19 10 $\mu\text{M}$           | 59.2634                  | 2.5058  |
| TAT-Gap19 5 $\mu\text{M}$            | 47.4886                  | 1.8262  |
| TAT-Gap19 1 $\mu\text{M}$            | 47.6801                  | 6.1592  |
| TAT-Gap19 0.1 $\mu\text{M}$          | 54.7775                  | 8.0668  |
| Gap19 100 $\mu\text{M}$              | 82.8115                  | 4.2932  |
| Gap19 5 $\mu\text{M}$                | 75.4661                  | 2.7612  |
| Gap27 100 $\mu\text{M}$              | 81.9131                  | 4.8462  |
| Gap27 5 $\mu\text{M}$                | 67.1248                  | 12.4100 |
| $\alpha\text{CT1}$ 100 $\mu\text{M}$ | 106.6684                 | 26.5628 |
| $\alpha\text{CT1}$ 5 $\mu\text{M}$   | 38.9928                  | 2.9283  |

<sup>a</sup>Mean normalized to calcium-free condition.

**Table S2.** ATP release data shown in **Figure 5b**. All compounds are used at 5  $\mu\text{M}$  concentration unless otherwise stated.

|              | ATP release <sup>a</sup> | SEM    |
|--------------|--------------------------|--------|
| Control      | 49.3877                  | 3.5875 |
| Calcium-free | 100                      | /      |

|                                 |          |         |
|---------------------------------|----------|---------|
| <b>Cbx 25 <math>\mu</math>M</b> | 60.4766  | 7.7089  |
| <b>Gap19</b>                    | 53.6525  | 6.9376  |
| <b>Gap27</b>                    | 58.4393  | 5.0960  |
| <b>TAT-Gap19</b>                | 39.8281  | 3.6046  |
| <b><math>\alpha</math>CT1</b>   | 41.1484  | 2.3267  |
| <b>CT10</b>                     | 55.4854  | 3.5503  |
| <b>1</b>                        | 56.0797  | 4.7121  |
| <b>2</b>                        | 53.0107  | 4.3760  |
| <b>3</b>                        | 58.4702  | 4.6215  |
| <b>4</b>                        | 66.2402  | 8.3886  |
| <b>5</b>                        | 55.5167  | 5.0309  |
| <b>6</b>                        | 53.7892  | 5.7785  |
| <b>7</b>                        | 54.2125  | 4.6657  |
| <b>8</b>                        | 47.8943  | 6.1749  |
| <b>9</b>                        | 46.7801  | 5.8877  |
| <b>10</b>                       | 54.7488  | 7.8867  |
| <b>11</b>                       | 43.9668  | 4.0310  |
| <b>12</b>                       | 46.6075  | 5.0229  |
| <b>13</b>                       | 43.8298  | 4.8075  |
| <b>14</b>                       | 46.2794  | 4.9171  |
| <b>Palm-CT10</b>                | 44.6669  | 4.0904  |
| <b>Palm-Gap19</b>               | 54.6035  | 5.4062  |
| <b>15</b>                       | 133.7852 | 28.8214 |
| <b>16</b>                       | 67.2242  | 7.8381  |
| <b>17</b>                       | 72.5860  | 15.9468 |

<sup>a</sup>Mean normalized to calcium-free condition.

**Table S3.** ATP release data shown in **Figure 6b**.

|                                                     | <b>ATP release<sup>a</sup></b> | <b>SEM</b> |
|-----------------------------------------------------|--------------------------------|------------|
| <b>Control</b>                                      | 54.5982                        | 4.6247     |
| <b>Calcium-free</b>                                 | 100                            | /          |
| <b>Cbx 25 <math>\mu</math>M</b>                     | 78.1965                        | 8.6963     |
| <b>Gap27 5 <math>\mu</math>M</b>                    | 57.8875                        | 5.2452     |
| <b>Gap27 0.1 <math>\mu</math>M</b>                  | 55.6856                        | 1.3460     |
| <b>TAT-Gap19 5 <math>\mu</math>M</b>                | 37.8190                        | 4.6963     |
| <b>TAT-Gap19 0.1 <math>\mu</math>M</b>              | 44.7697                        | 3.7317     |
| <b><math>\alpha</math>CT1 5 <math>\mu</math>M</b>   | 42.2267                        | 3.1507     |
| <b><math>\alpha</math>CT1 0.1 <math>\mu</math>M</b> | 50.5858                        | 5.4295     |
| <b>11 5 <math>\mu</math>M</b>                       | 43.9424                        | 5.5982     |
| <b>11 0.1 <math>\mu</math>M</b>                     | 52.4234                        | 4.9713     |
| <b>12 5 <math>\mu</math>M</b>                       | 62.4101                        | 6.1084     |
| <b>12 0.1 <math>\mu</math>M</b>                     | 57.9562                        | 9.9702     |
| <b>13 5 <math>\mu</math>M</b>                       | 51.4148                        | 7.3095     |
| <b>13 0.1 <math>\mu</math>M</b>                     | 79.7386                        | 20.1216    |
| <b>14 5 <math>\mu</math>M</b>                       | 54.5492                        | 7.2228     |
| <b>14 0.1 <math>\mu</math>M</b>                     | 70.4794                        | 12.3845    |
| <b>Palm-CT10 5 <math>\mu</math>M</b>                | 58.4669                        | 12.1414    |
| <b>Palm-CT10 0.1 <math>\mu</math>M</b>              | 50.8713                        | 4.5227     |
| <b>Palm-Gap19 5 <math>\mu</math>M</b>               | 49.4210                        | 6.9054     |
| <b>Palm-Gap19 0.1 <math>\mu</math>M</b>             | 55.9035                        | 7.7251     |
| <b>15 5 <math>\mu</math>M</b>                       | 133.7852                       | 28.8214    |
| <b>15 0.1 <math>\mu</math>M</b>                     | 81.9773                        | 5.9136     |
| <b>16 5 <math>\mu</math>M</b>                       | 77.0091                        | 12.0120    |
| <b>16 0.1 <math>\mu</math>M</b>                     | 44.8448                        | 3.5623     |

|                                 |         |         |
|---------------------------------|---------|---------|
| <b>17 5 <math>\mu</math>M</b>   | 72.5860 | 15.9468 |
| <b>17 0.1 <math>\mu</math>M</b> | 54.4498 | 7.2777  |
| <b>18 5 <math>\mu</math>M</b>   | 61.6970 | 5.0018  |
| <b>18 0.1 <math>\mu</math>M</b> | 52.2265 | 7.4227  |

<sup>a</sup>Mean normalized to calcium-free condition.

**Table S4.** ATP release data shown in **Figure 8b**. All compounds are used at 5  $\mu$ M concentration unless otherwise stated.

|                                 | Parental HeLa            |        | HeLa-Cx43                |        |
|---------------------------------|--------------------------|--------|--------------------------|--------|
|                                 | ATP release <sup>a</sup> | SEM    | ATP release <sup>a</sup> | SEM    |
| <b>Control</b>                  | 1.7647                   | 0.1682 | 4.0067                   | 0.2481 |
| <b>Calcium-free</b>             | 1.7919                   | 0.4219 | 18.2058                  | 1.2244 |
| <b>Cbx 25 <math>\mu</math>M</b> | 0.9207                   | 0.0167 | 2.1867                   | 0.5339 |
| <b>Gap27</b>                    | 0.9529                   | 0.0983 | 9.3690                   | 0.9358 |
| <b>TAT-Gap19</b>                | 1.3701                   | 0.2847 | 10.9629                  | 0.7689 |
| <b><math>\alpha</math>CT1</b>   | 1.6218                   | 0.4958 | 9.6282                   | 0.1351 |
| <b>11</b>                       | 1.5371                   | 0.4916 | 8.7419                   | 0.9250 |

<sup>a</sup>Mean (in nM).

**Table S5.** ATP release data shown in **Figure 8c**. All compounds are used at 5  $\mu$ M concentration unless otherwise stated.

|                                 | Parental SK-HEP-1        |        | SK-HEP-1-Cx43            |         |
|---------------------------------|--------------------------|--------|--------------------------|---------|
|                                 | ATP release <sup>a</sup> | SEM    | ATP release <sup>a</sup> | SEM     |
| <b>Control</b>                  | 10.0176                  | 1.5382 | 30.0127                  | 3.2453  |
| <b>Calcium-free</b>             | 28.7505                  | 4.9305 | 92.3906                  | 17.9121 |
| <b>Cbx 25 <math>\mu</math>M</b> | 13.9931                  | 2.4139 | 26.4826                  | 3.7740  |
| <b>Gap27</b>                    | 8.5784                   | 0.9461 | 36.9304                  | 1.2387  |
| <b>TAT-Gap19</b>                | 15.3639                  | 2.1802 | 55.5511                  | 7.7043  |
| <b><math>\alpha</math>CT1</b>   | 6.6804                   | 1.0241 | 39.5655                  | 4.5254  |
| <b>11</b>                       | 7.9522                   | 0.3945 | 38.4712                  | 1.9023  |

<sup>a</sup>Mean (in nM).

### 3. Peptide characterization

#### 3a. HPLC chromatograms of peptides

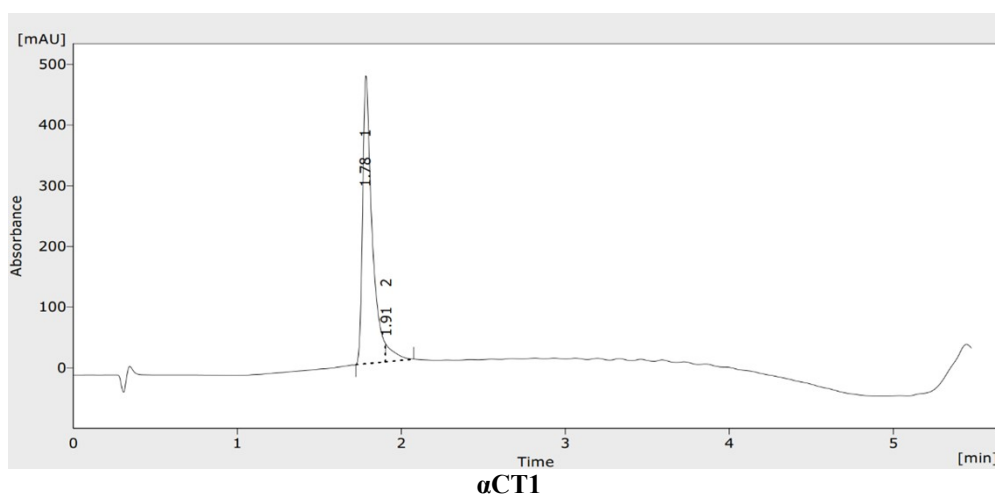

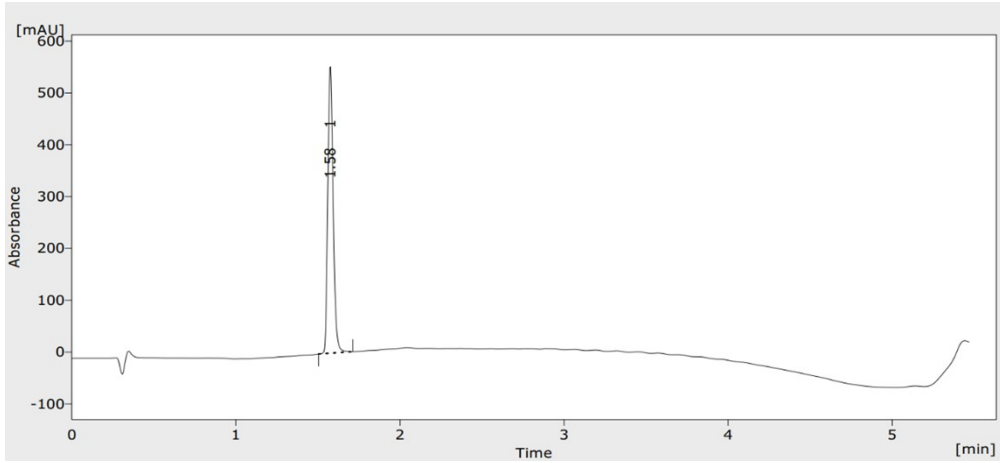

**CT10**

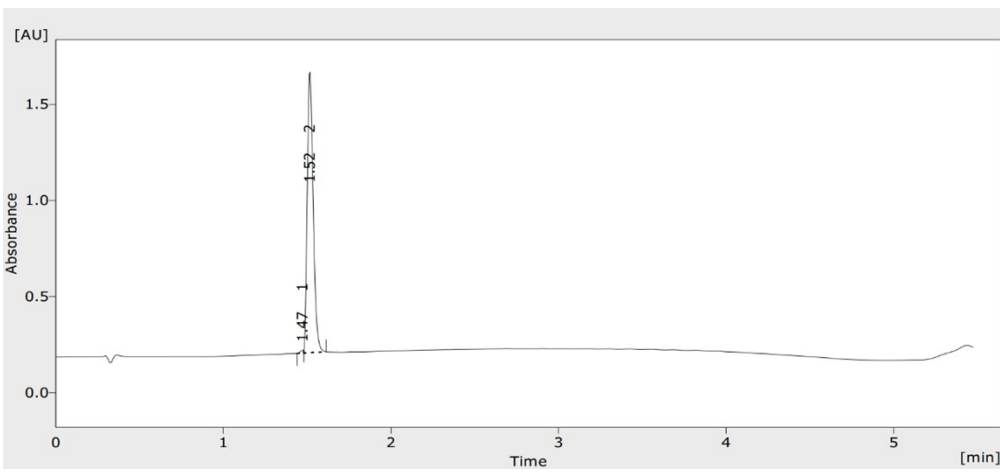

**Gap19**

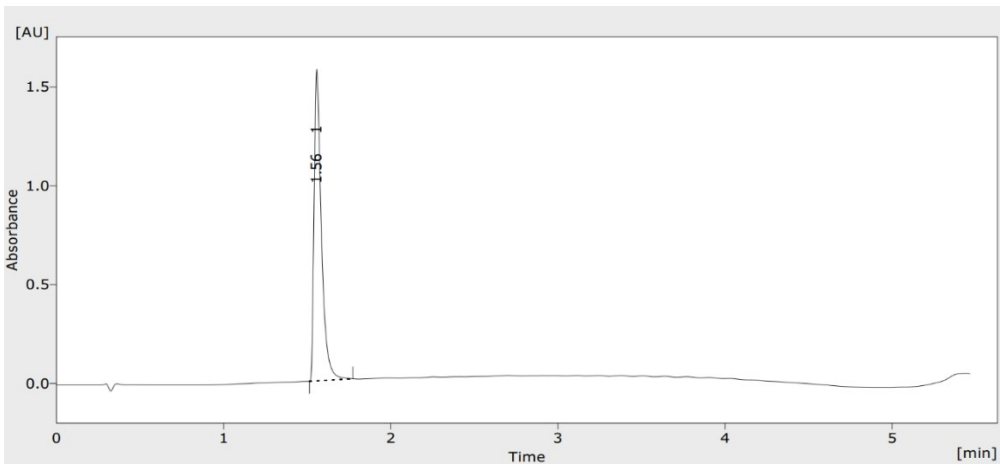

**TAT-Gap19**

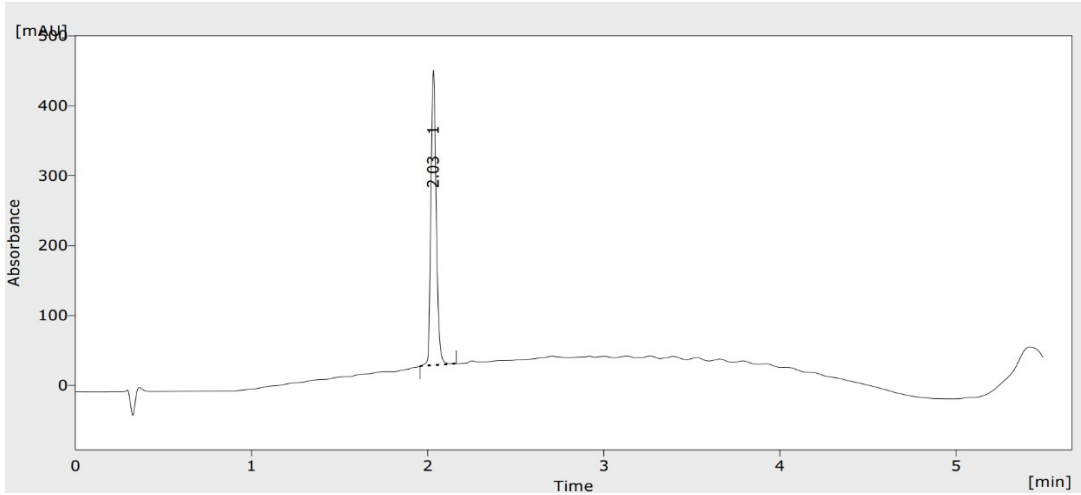

**Gap27**

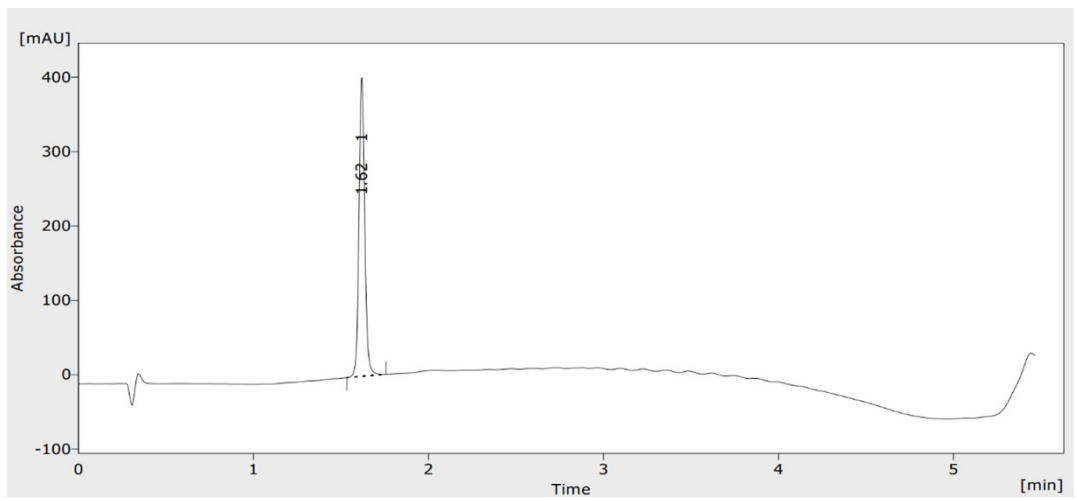

**1**

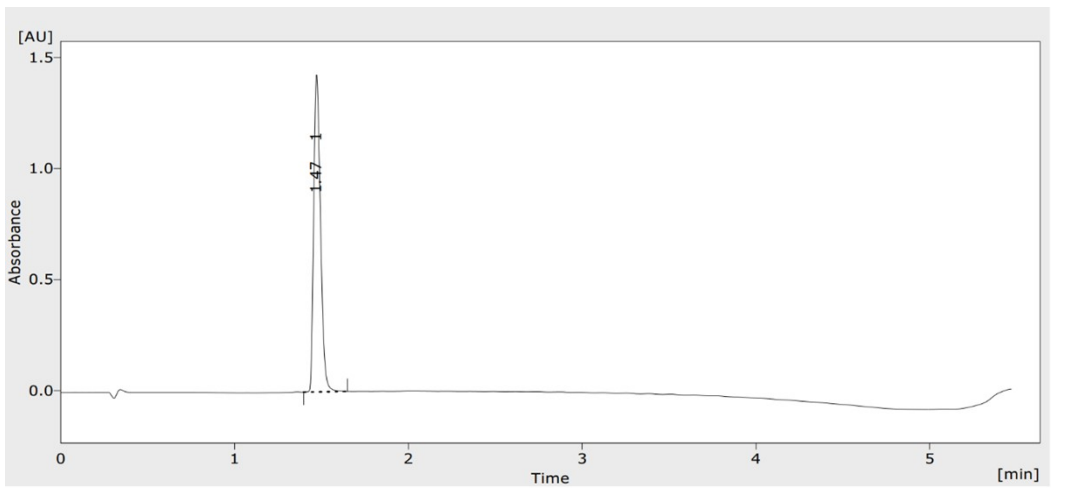

**2**

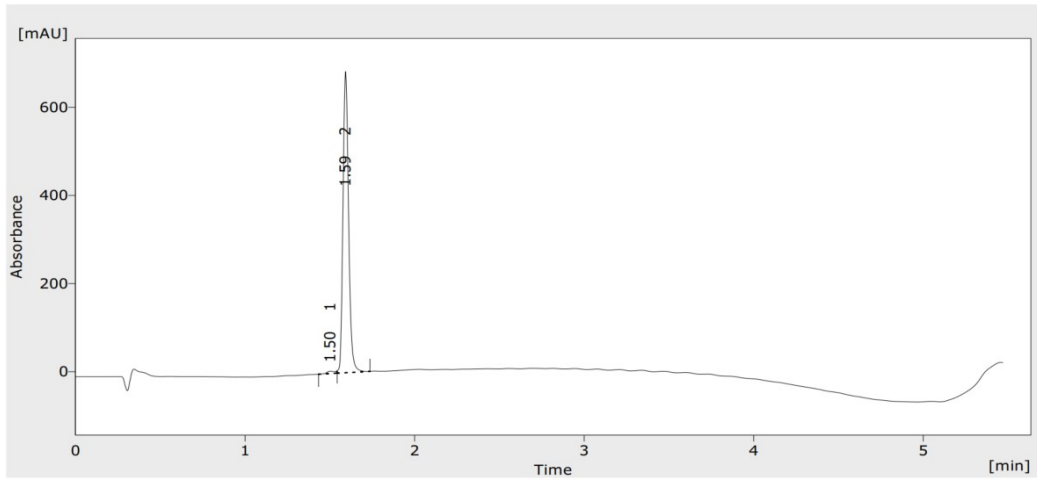

3

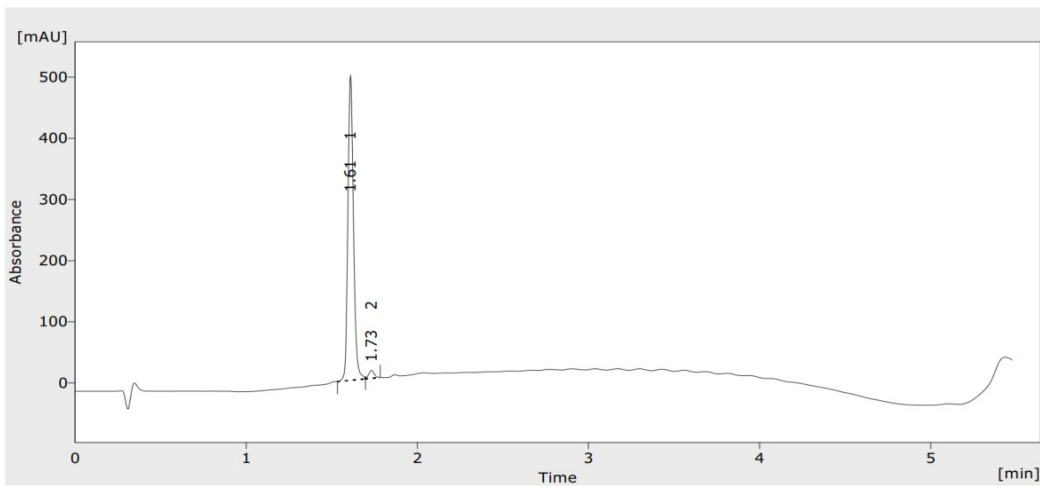

4

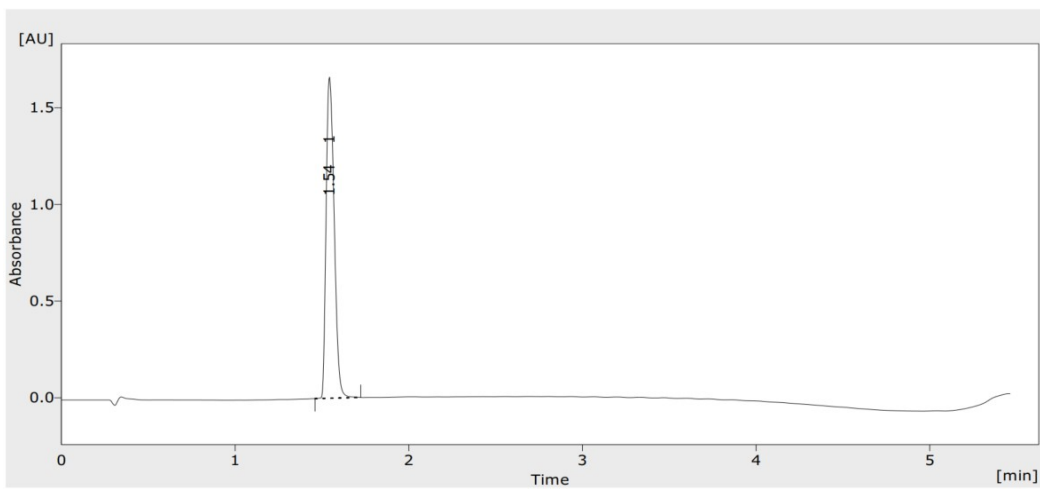

5

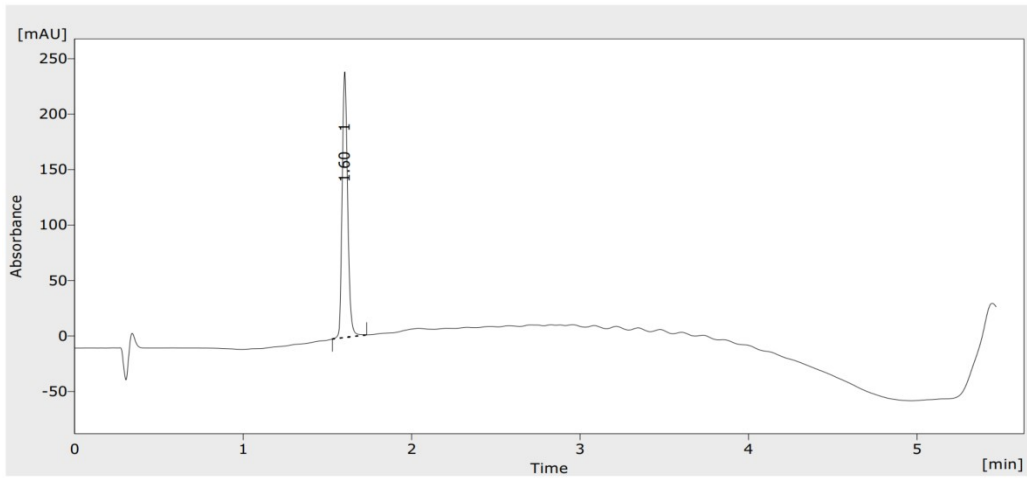

6

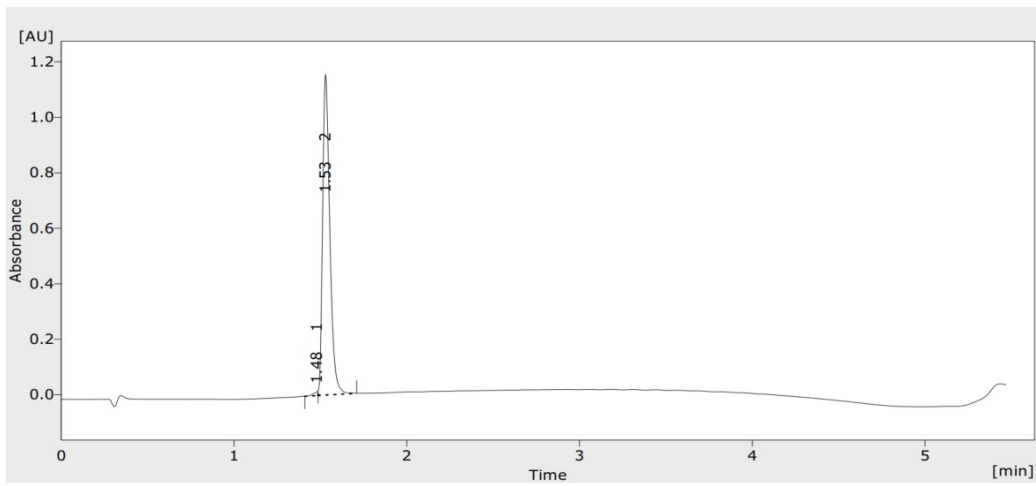

7

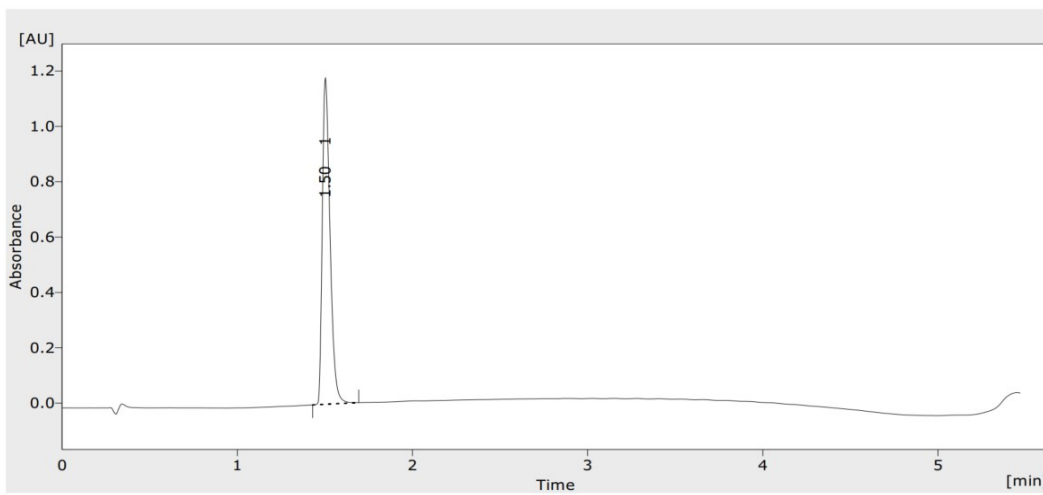

8



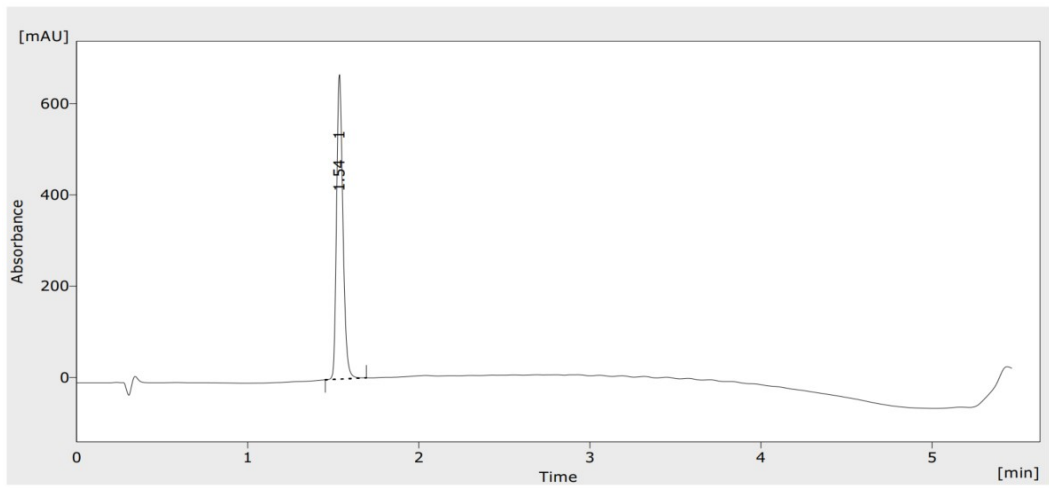

9

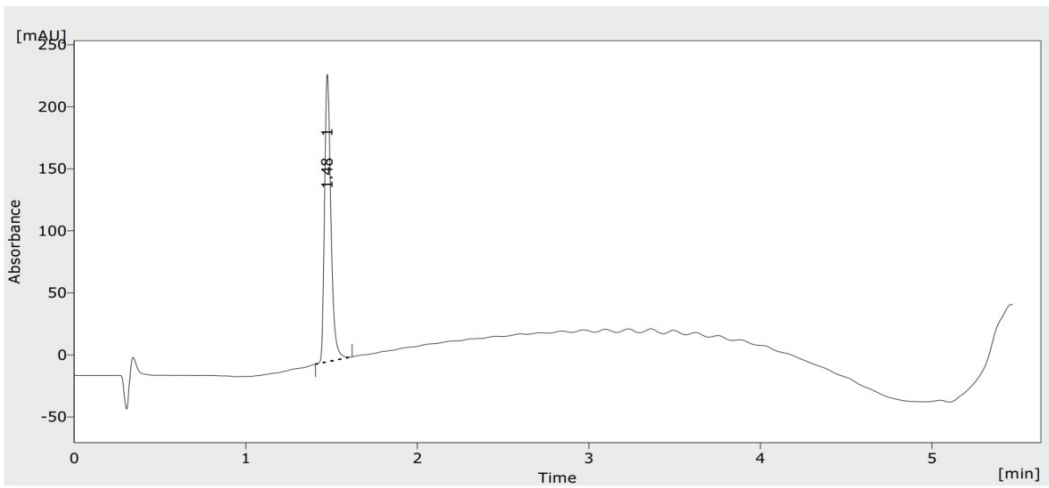

10

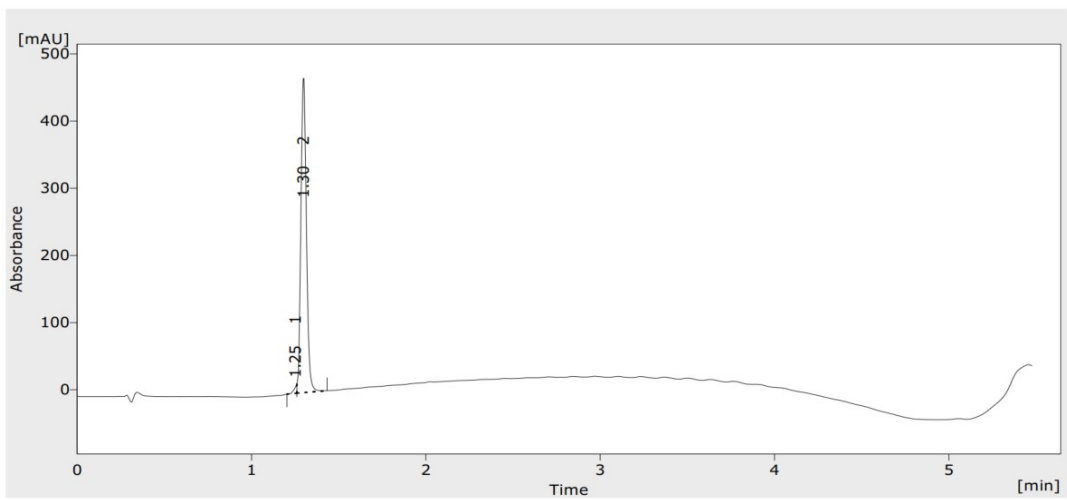

11

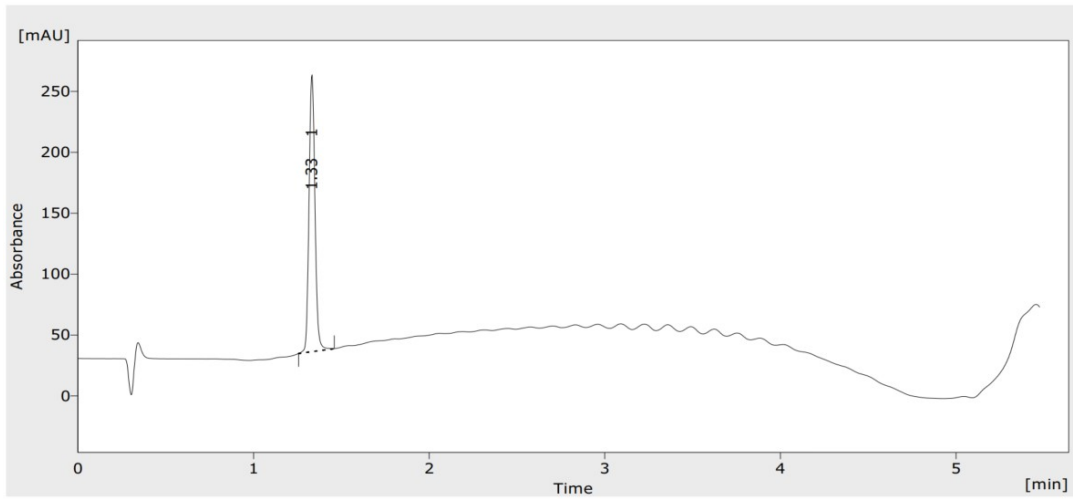

12

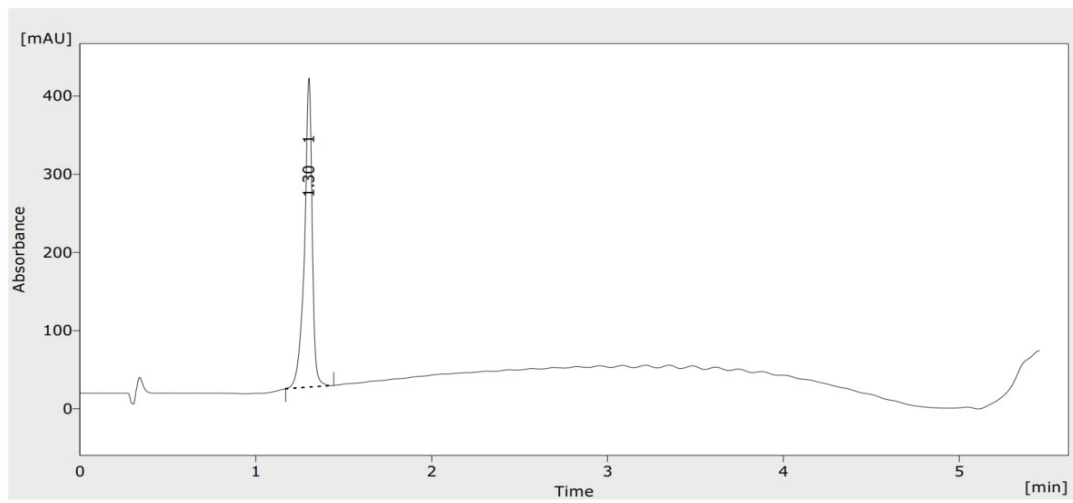

13

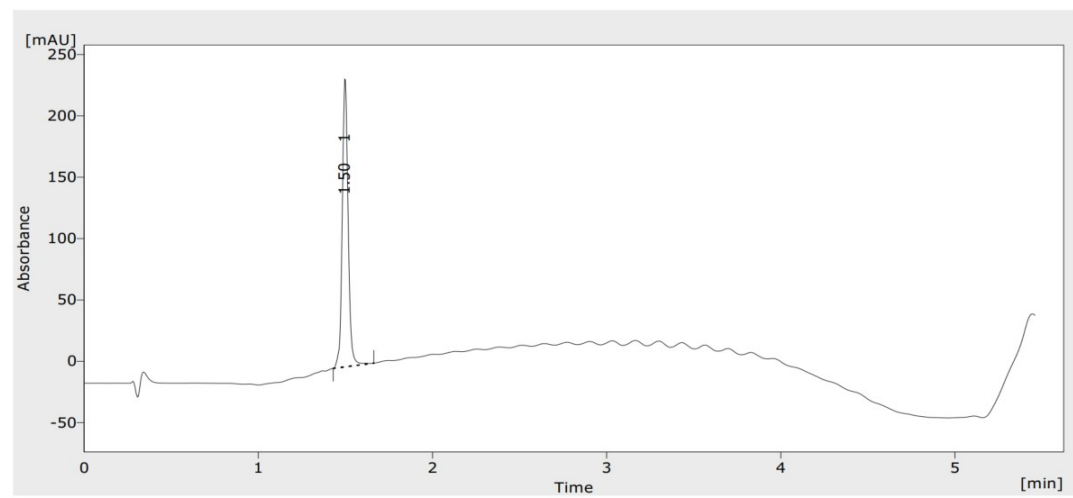

14

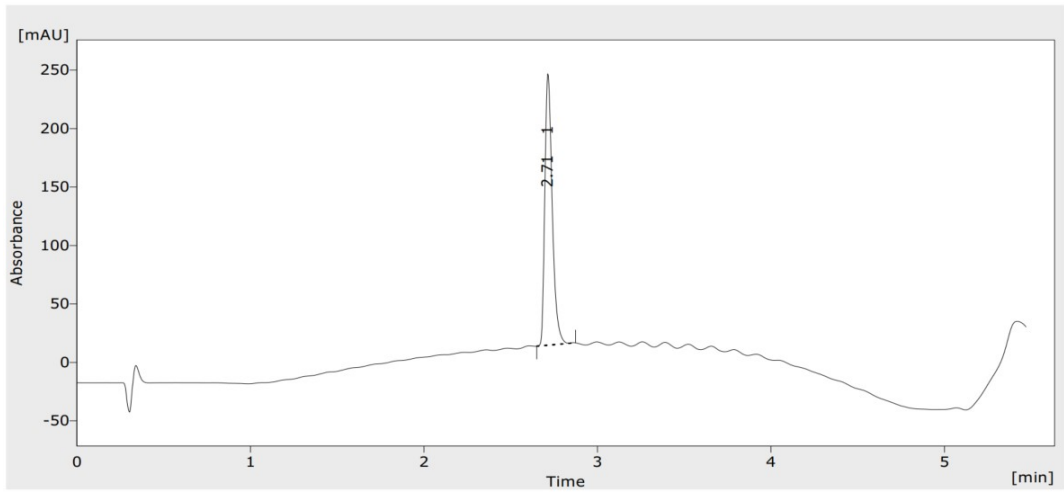

**Tat-CT10**

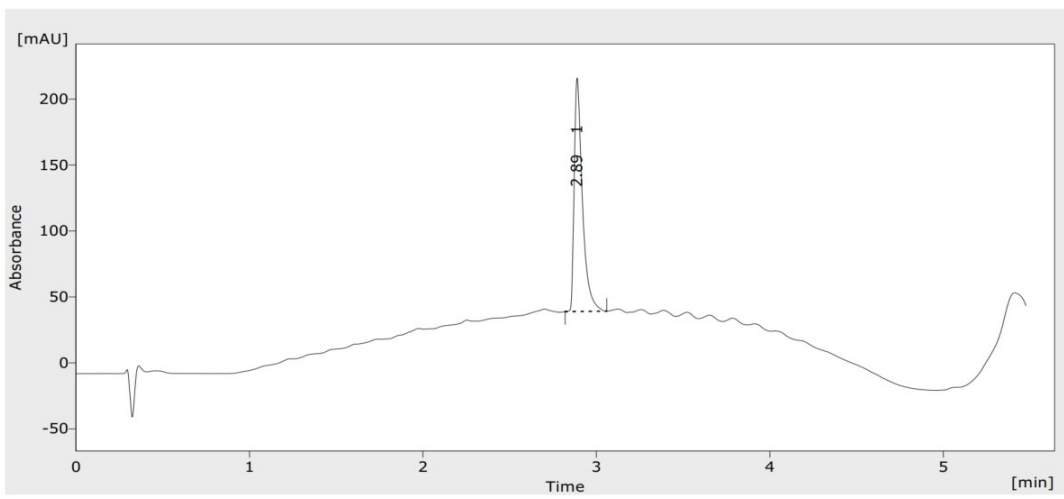

**TAT-Gap19**

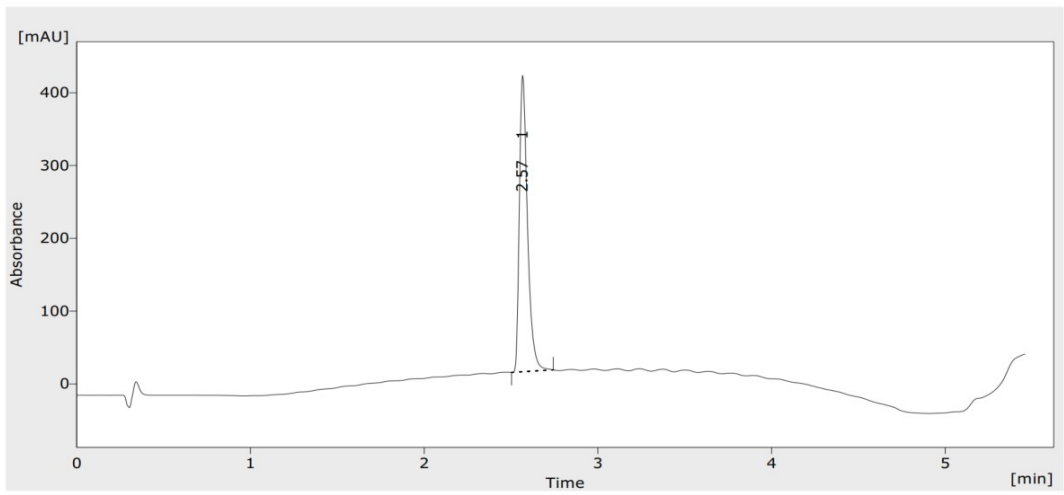

**15**

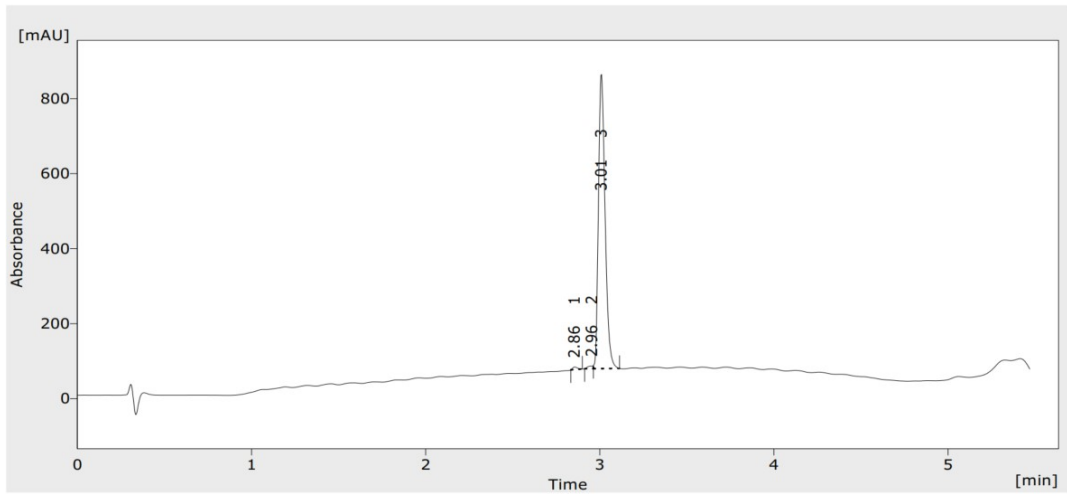

16

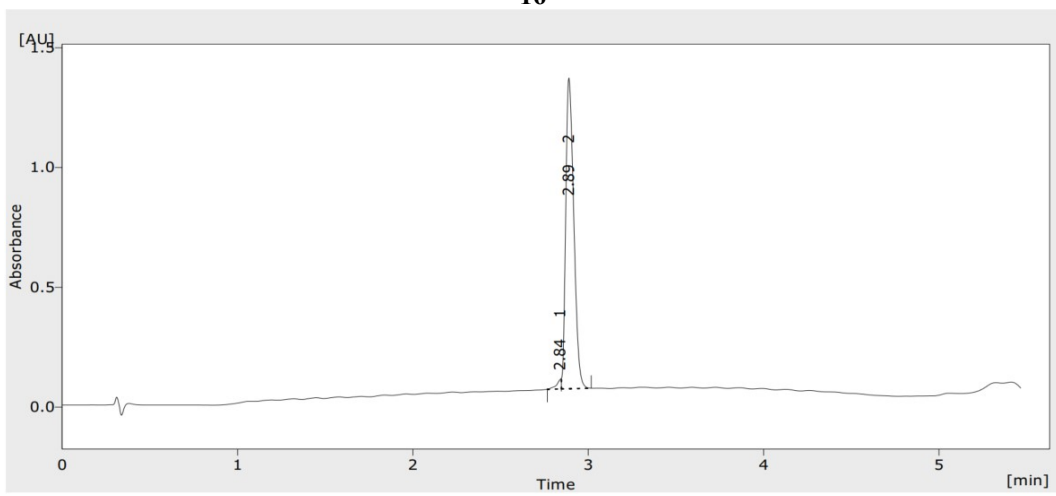

17

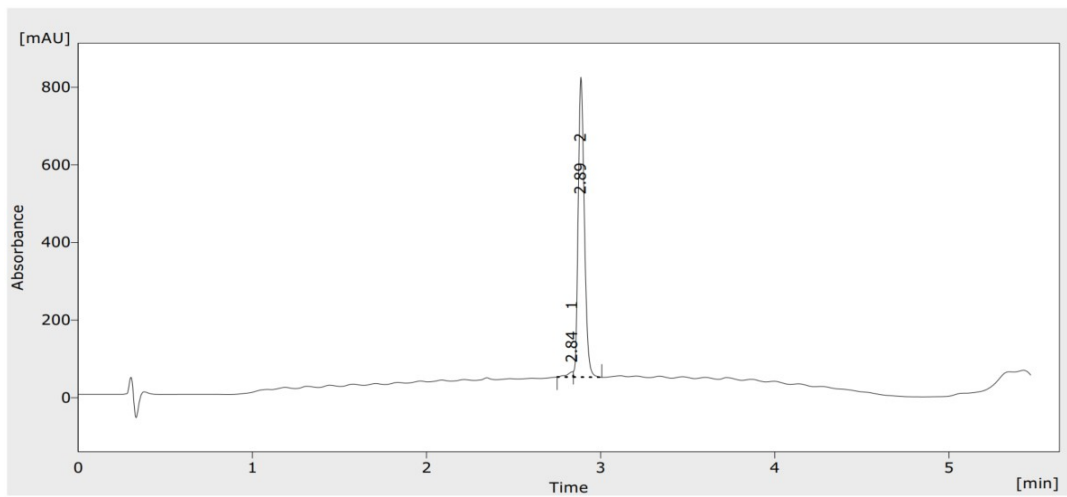

18

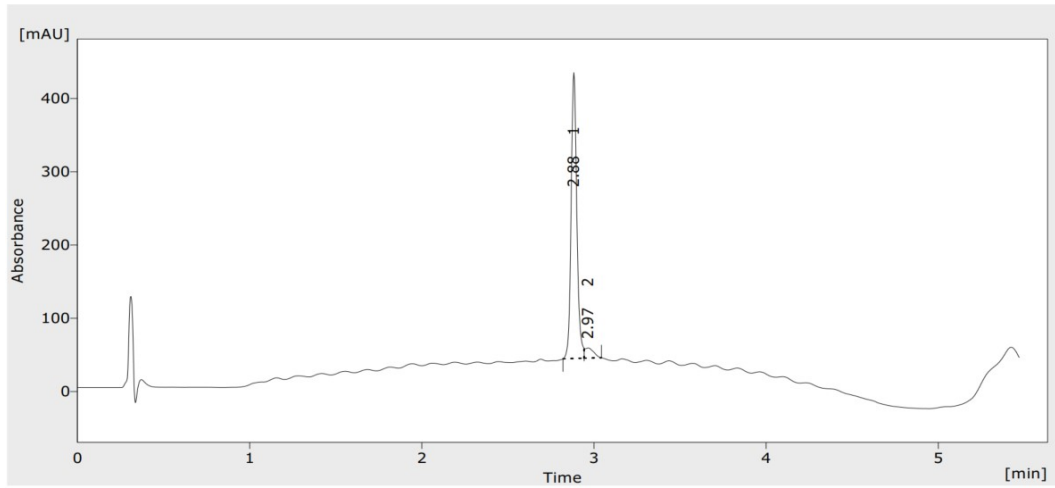

19

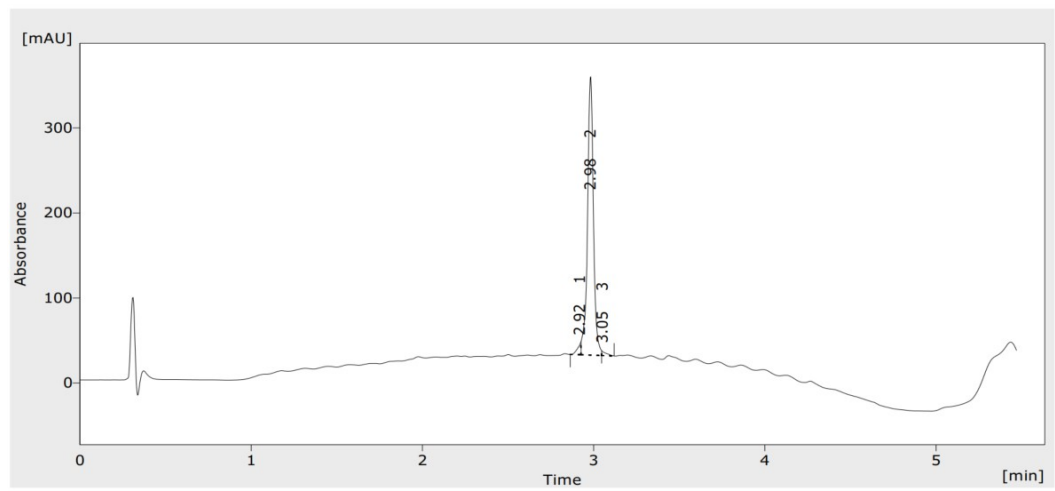

20

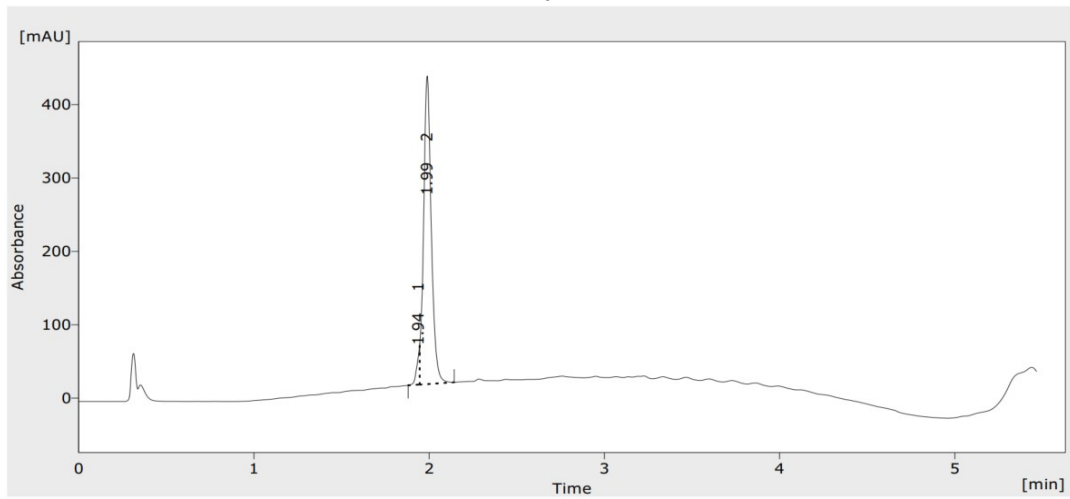

21

### 3b. Characterization

**Table S6.** a) [M+H]<sup>+</sup>; (b) as determined by RP-HPLC; (c) [M+2H]<sup>++</sup>. Azp = (4S)-4-azidoproline, Pra = propargylglycine, Azk = azidolysine, Palm = palmitic acid, Ahx = 6-aminohexanoic acid. Residues between squares? are part of the peptide macrocycle.

| Peptide                          | Sequence                                                                                                                              | MW (TFA salt) | HRMS calculated <sup>(a)</sup> | HRMS found <sup>(a)</sup> | Rt <sup>(b)</sup> (min) | Yield (%) | Purity (%) | Formula         |
|----------------------------------|---------------------------------------------------------------------------------------------------------------------------------------|---------------|--------------------------------|---------------------------|-------------------------|-----------|------------|-----------------|
| <b>αCT1</b>                      | H-Arg-Gln-Pro-Lys-Ile-Trp-Phe-Pro-Asn-Arg-Arg-Lys-Pro-Trp-Lys-Lys-Arg-Pro-Arg-Pro-Asp-Asp-Leu-Glu-Ile-OH                              | 4398.09       | 1629.4277 <sup>(c)</sup>       | 1629.4271 <sup>(c)</sup>  | 1.78                    | 17        | 95         | C150H238N48O34  |
| <b>CT10</b>                      | H-Ser-Arg-Pro-Arg-Pro-Asp-Asp-Leu-Glu-Ile-OH                                                                                          | 1539.37       | 1197.6228                      | 1197.6255                 | 1.58                    | 55        | >99        | C50H84N16O18    |
| <b>Gap19</b>                     | H-Lys-Gln-Glu-Ile-Lys-Lys-Phe-Lys-OH                                                                                                  | 1731.57       | 1161.7360                      | 1161.7383                 | 1.52                    | 49        | 99         | C55H96N14O13    |
| <b>TAT-Gap19</b>                 | H-Tyr-Gly-Arg-Lys-Lys-Arg-Arg-Gln-Arg-Arg-Arg-Lys-Gln-Ile-Glu-Ile-Lys-Lys-Phe-Lys-OH                                                  | 4185.60       | 1351.8419 <sup>(c)</sup>       | 1351.8451 <sup>(c)</sup>  | 1.56                    | 34        | >99        | C119H212N46O26  |
| <b>Gap27</b>                     | H-Ser-Arg-Pro-Thr-Glu-Lys-Thr-Ile-Phe-Ile-Ile-OH                                                                                      | 1646.63       | 1304.7578                      | 1304.7594                 | 2.03                    | 49        | >99        | C49H85N13O12    |
| <b>1 (SBL-CX43-106)</b>          | Ac-Ser-Arg-Pro-Arg-Pro-Asp-Asp-Leu-Glu-Ile-OH                                                                                         | 1467.38       | 1239.6333                      | 1239.6327                 | 1.62                    | 77        | >99        | C52H86N16O19    |
| <b>2 (SBL-CX43-107)</b>          | H-Ser-Arg-Pro-Arg-Pro-Asp-Asp-Leu-Glu-Ile-NH <sub>2</sub>                                                                             | 1538.37       | 1196.6388                      | 1196.6404                 | 1.47                    | 16        | 99         | C50H85N17O17    |
| <b>3 (SBL-CX43-108)</b>          | H-Ser-Ala-Pro-Arg-Pro-Asp-Asp-Leu-Glu-Ile-OH                                                                                          | 1340.25       | 1112.5588                      | 1112.5626                 | 1.59                    | 22        | 99         | C47H77N13O18    |
| <b>4 (SBL-CX43-109)</b>          | H-Ser-Arg-Pro-Ala-Pro-Asp-Asp-Leu-Glu-Ile-OH                                                                                          | 1340.25       | 1112.5588                      | 1112.5614                 | 1.61                    | 44        | 98         | C47H77N13O18    |
| <b>5 (SBL-CX43-110)</b>          | H-Ser-Arg-Pro-Arg-Pro-Ala-Asp-Leu-Glu-Ile-OH                                                                                          | 1495.38       | 1153.6329                      | 1153.6359                 | 1.54                    | 23        | >99        | C49H84N16O16    |
| <b>6 (SBL-CX43-111)</b>          | H-Ser-Arg-Pro-Arg-Pro-Asp-Ala-Leu-Glu-Ile-OH                                                                                          | 1495.38       | 1153.6329                      | 1153.6375                 | 1.60                    | 42        | >99        | C49H84N16O16    |
| <b>7 (SBL-CX43-112)</b>          | H-Ser-Arg-Pro-Arg-Pro-Asp-Asp-Leu-Ala-Ile-OH                                                                                          | 1481.35       | 1139.6173                      | 1139.6201                 | 1.53                    | 13        | 99         | C48H82N16O16    |
| <b>8 (SBL-CX43-113)</b>          | H-Ser-Arg-Ala-Arg-Pro-Asp-Asp-Leu-Glu-Ile-OH                                                                                          | 1513.35       | 1171.6072                      | 1171.6097                 | 1.50                    | 20        | 99         | C48H82N16O18    |
| <b>9 (SBL-CX43-114)</b>          | H-Ser-Arg-Pro-Arg-Ala-Asp-Asp-Leu-Glu-Ile-OH                                                                                          | 1513.35       | 1171.6072                      | 1171.6073                 | 1.54                    | 48        | >99        | C48H82N16O18    |
| <b>10 (SBL-CX43-147)</b>         | H-Ser-Arg-Ala-Arg-Ala-Asp-Asp-Leu-Glu-Ile-OH                                                                                          | 1487.31       | 1145.5914                      | 1145.5938                 | 1.48                    | 19        | >99        | C46H80N16O18    |
| <b>11 (SBL-CX43-125)</b>         | Ac-Ser-Arg-Pro-Arg- <b>[Azp]</b> -Asp-Asp-Leu-Glu- <b>[Pra]</b> -NH <sub>2</sub>                                                      | 1489.37       | 1261.6038                      | 1261.6045                 | 1.30                    | 14        | 99         | C51H80N20O18    |
| <b>12 (SBL-CX43-138)</b>         | Ac-Ser-Arg-Pro-Arg- <b>c[Pra]</b> -Asp-Asp-Leu-Glu- <b>[Azk]</b> -NH <sub>2</sub>                                                     | 1505.41       | 1277.6351                      | 1277.6340                 | 1.33                    | 9         | >99        | C52H84N20O18    |
| <b>13 (SBL-CX43-139)</b>         | Ac-Ser-Arg-Pro-Arg- <b>c[Azp]</b> -Asp-Asp- <b>[Pra]</b> -Glu-Ile-NH <sub>2</sub>                                                     | 1489.37       | 1261.6038                      | 1261.6038                 | 1.30                    | 9         | >99        | C51H80N20O18    |
| <b>14 (SBL-CX43-140)</b>         | Ac- <b>c[Pra]</b> -Arg-Pro-Arg- <b>[Azk]</b> -Asp-Asp-Leu-Glu-Ile-NH <sub>2</sub>                                                     | 1531.49       | 1303.6871                      | 1303.6846                 | 1.50                    | 4         | 95         | C55H90N20O17    |
| <b>Palm-CT10 (SBL-CX43-135)</b>  | Palm-Ser-Arg-Pro-Arg-Pro-Asp-Asp-Leu-Glu-Ile-OH                                                                                       | 1663.78       | 1435.8524                      | 1435.8545                 | 2.71                    | 26        | 99         | C66H114N16O19   |
| <b>Palm-Gap19 (SBL-CX43-137)</b> | Palm-Lys-Gln-Ile-Glu-Ile-Lys-Lys-Phe-Lys-OH                                                                                           | 1855.97       | 1399.9656                      | 1399.9698                 | 2.89                    | 31        | >99        | C71H126N14O14   |
| <b>15 (SBL-CX43-152)</b>         | Palm-εLys-PEG-Ser-Arg-Pro-Arg-Pro-Asp-Asp-Leu-Glu-Ile-OH                                                                              | 2051.13       | 1709.0212                      | 1709.0217                 | 2.57                    | 6         | 98         | C78H137N19O23   |
| <b>16 (SBL-CX43-153)</b>         | Palm-εLys-Ser-Arg-Pro-Arg-Pro-Asp-Asp-Leu-Glu-Ile-OH                                                                                  | 1905.98       | 1563.9474                      | 1563.9469                 | 3.01                    | 11        | 98         | C72H126N18O20   |
| <b>17 (SBL-CX43-154)</b>         | Palm-Lys-Ser-Arg-Pro-Arg-Pro-Asp-Asp-Leu-Glu-Ile-OH                                                                                   | 1905.98       | 1563.9474                      | 1563.9492                 | 2.89                    | 24        | 98         | C72H126N18O20   |
| <b>18 (SBL-CX43-157)</b>         | Palm-εLys-Ser-Arg-Pro-Arg- <b>c[Azp]</b> -Asp-Asp-Leu-Glu- <b>[Pra]</b> -NH <sub>2</sub>                                              | 1927.95       | 1585.9178                      | 1585.9183                 | 2.89                    | 4         | 98         | C71H120N22O19   |
| <b>19 (SBL-CX43-158)</b>         | Palm-εLys-Ser-Arg-Pro-Arg- <b>c[Azp]</b> -Asp-Asp-Leu-Glu- <b>[Pra]</b> -Ahx-Lys(Fluorescein)-Ahx-Cys-Arg-Pro-Pro-Arg-NH <sub>2</sub> | 3476.57       | 1454.2767 <sup>c</sup>         | 1454.2802 <sup>c</sup>    | 2.88                    | 2         | 95         | C135H207N37O33S |
| <b>20 (SBL-CX43-159)</b>         | Palm-εLys-Ser-Arg-Pro-Arg- <b>c[Azp]</b> -Asp-Asp-Leu-Glu- <b>[Pra]</b> -Ahx-Lys(Fluorescein)-NH <sub>2</sub>                         | 2525.61       | 1093.0762 <sup>c</sup>         | 1093.0773 <sup>c</sup>    | 2.98                    | 2         | 96         | C104H153N25O27  |
| <b>21 (SBL-CX43-160)</b>         | Ac-Ser-Arg-Pro-Arg- <b>c[Azp]</b> -Asp-Asp-Leu-Glu- <b>[Pra]</b> -Ahx-Lys(Fluorescein)-Ahx-Cys-Arg-Pro-Pro-Arg-NH <sub>2</sub>        | 3037.99       | 1292.1196 <sup>c</sup>         | 1292.1194 <sup>c</sup>    | 1.99                    | 1         | 95         | C115H167N35O32S |
